# Supplementary material for: Screw-Dislocation-Driven Growth Mode in Two Dimensional GaSe on GaAs(001) Substrates Grown by Molecular Beam Epitaxy
Source: PubMed Central journal article supplement (PMC6883029; doi:10.1038/s41598-019-54406-5), 2019-11-28
Supplement: 41598_2019_54406_MOESM1_ESM.pdf [file 41598_2019_54406_MOESM1_ESM.pdf]

## SUPPLEMENTARY INFORMATION for

### **Screw-Dislocation-Driven Growth Mode in Two Dimensional GaSe on GaAs (001) Substrates grown by Molecular Beam Epitaxy**

Nhu Quynh Diep<sup>1</sup>, Cheng-Wei Liu<sup>1</sup>, Ssu-Kuan Wu<sup>1</sup>, Wu-Ching Chou<sup>1,\*</sup>, Sa Hoang Huynh<sup>2,4</sup>, and Edward Yi Chang<sup>2,3</sup>

<sup>1</sup>*Department of Electrophysics, College of Sciences, National Chiao Tung University, 1001 University Road, Hsinchu 30010, Taiwan, R.O.C.*

<sup>2</sup>*Department of Materials Science and Engineering, College of Engineering, National Chiao Tung University, 1001 University Road, Hsinchu 30010, Taiwan, R.O.C.*

<sup>3</sup>*International College of Semiconductor Technology, National Chiao Tung University, 1001 University Road, Hsinchu 30010, Taiwan, R.O.C.*

<sup>4</sup>*Present address: School of Physics and Astronomy, Cardiff University, Cardiff CF24 3AA, United Kingdom.*

**\*Corresponding author:** [wuchingchou@mail.nctu.edu.tw](mailto:wuchingchou@mail.nctu.edu.tw)

**Figure S1.** Sketch of the growth process of without (a) and with (b) Se-pretreated samples

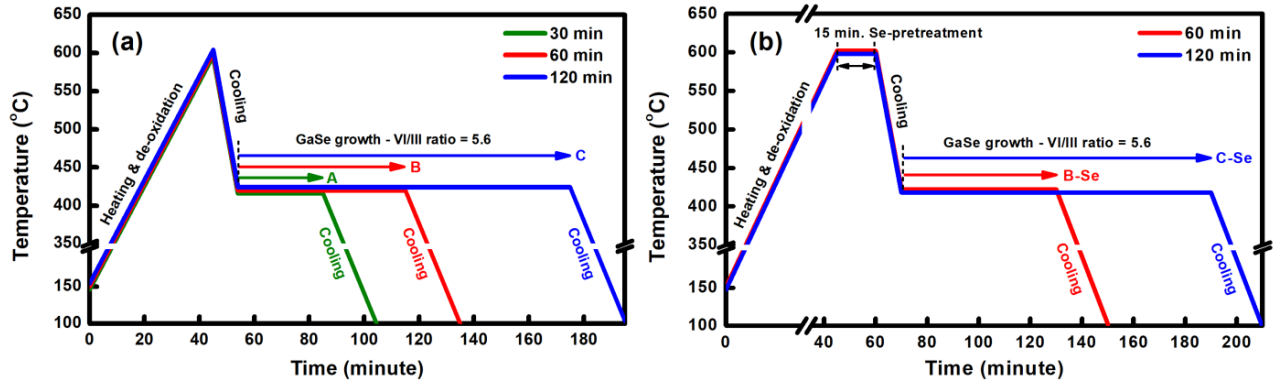

**Figure S2.** In-situ RHEED patterns: (a) and (b) represented to GaAs(001) substrate after thermal oxide desorption; (c) and (d) represented to non Se-pretreated sample during the materials growth; (e) the intensity profiles extracted from (c) and (d); and (f) the sketch of atomic alignment between GaSe layer and GaAs(001).

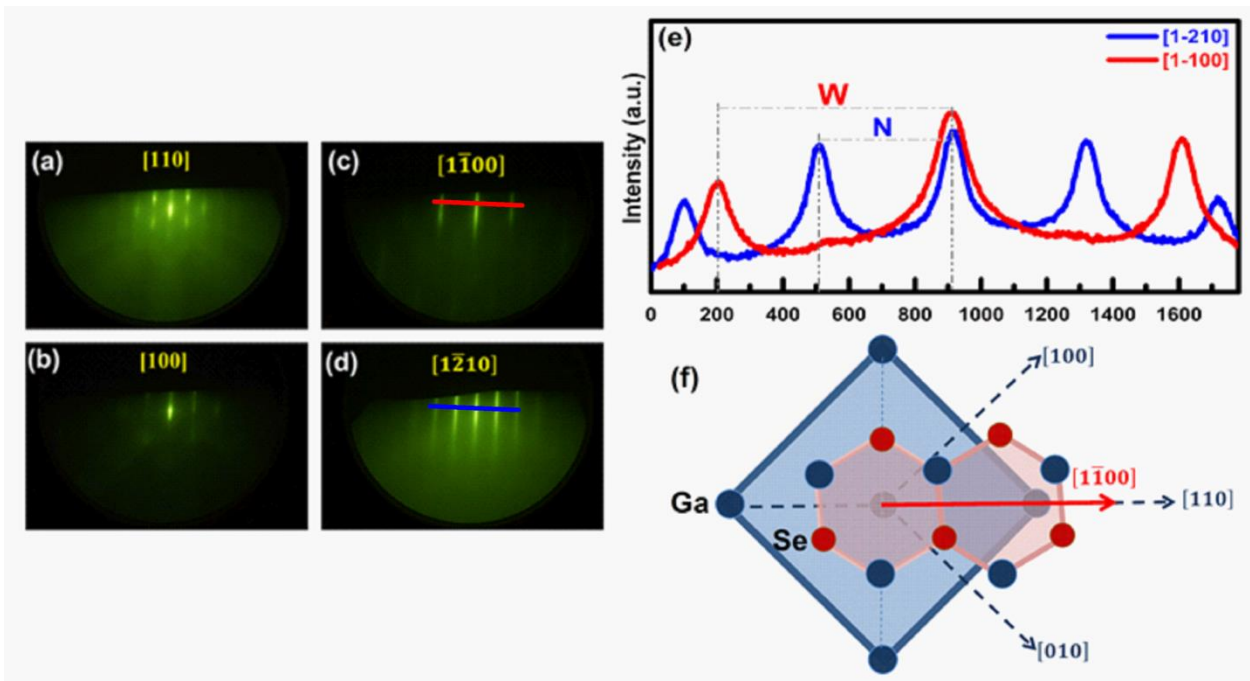

**Figure S3.** AFM images, Raman scattering, and photoluminescence spectrum of GaSe grown on GaN/Sapphire substrate

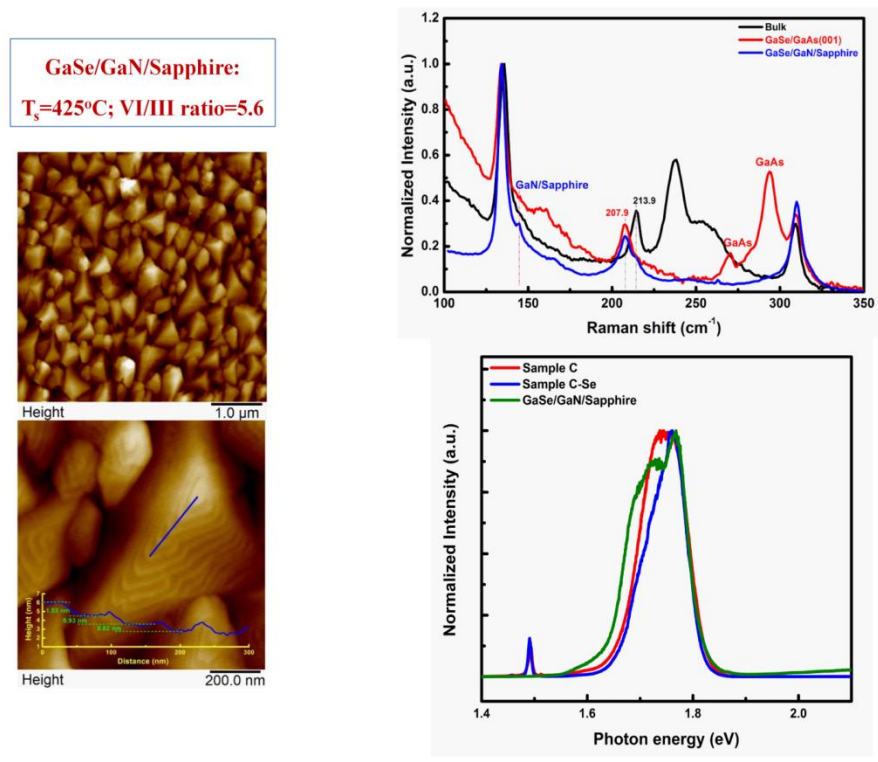

**Figure S4.** XRD  $2\theta$ -scanning spectra of GaSe sample C in comparison to GaSe bulk. The inset shows the  $2\theta$ -scanning spectra of (004)-peak with the step scan size of 14 arcsec.

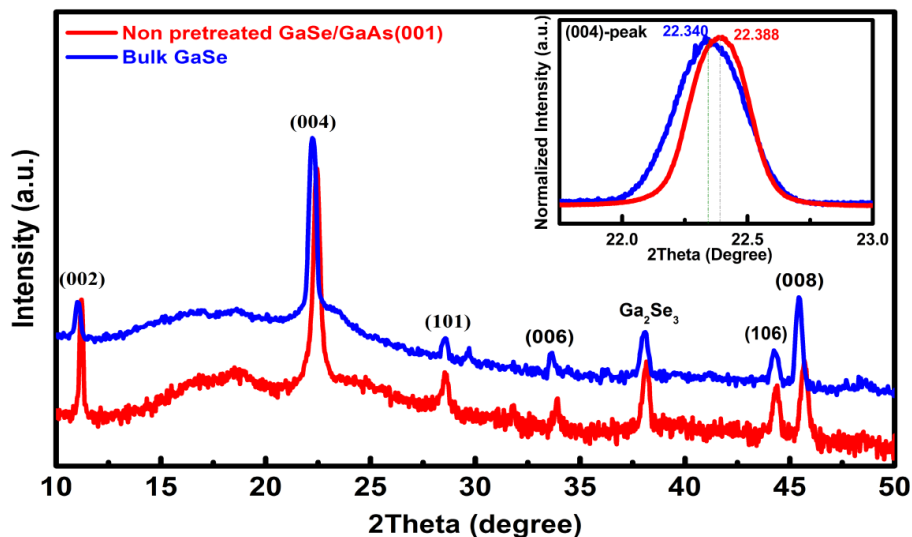

**Figure S5.** Raman spectrum of sample C compare to that of the bulk under 514 nm wavelength excitation.

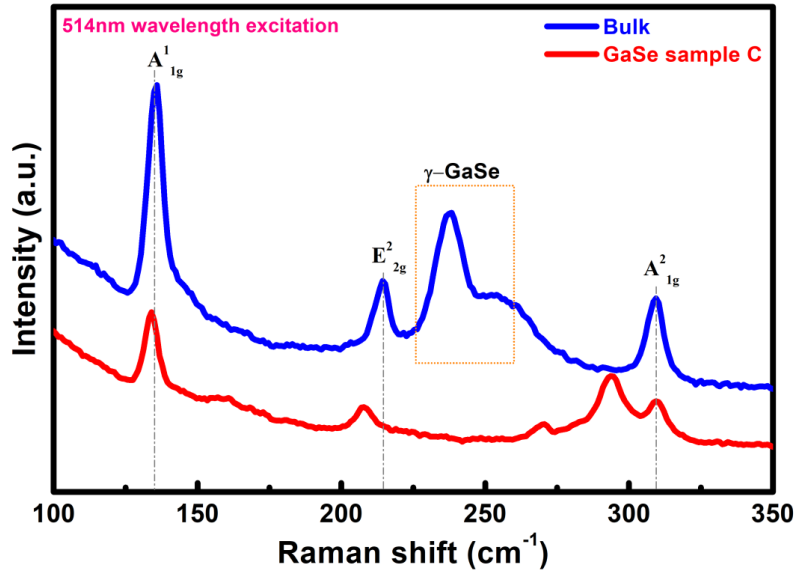

**Figure S6.** In-situ RHEED patterns: (a) and (b) represented to Se-pretreated GaAs(001) substrate; (c), (d) represented to Se-pretreated sample C-Se during the material growth; (e) the sketch of atomic alignment between GaSe layer and the Se-passivated GaAs(001) substrate.

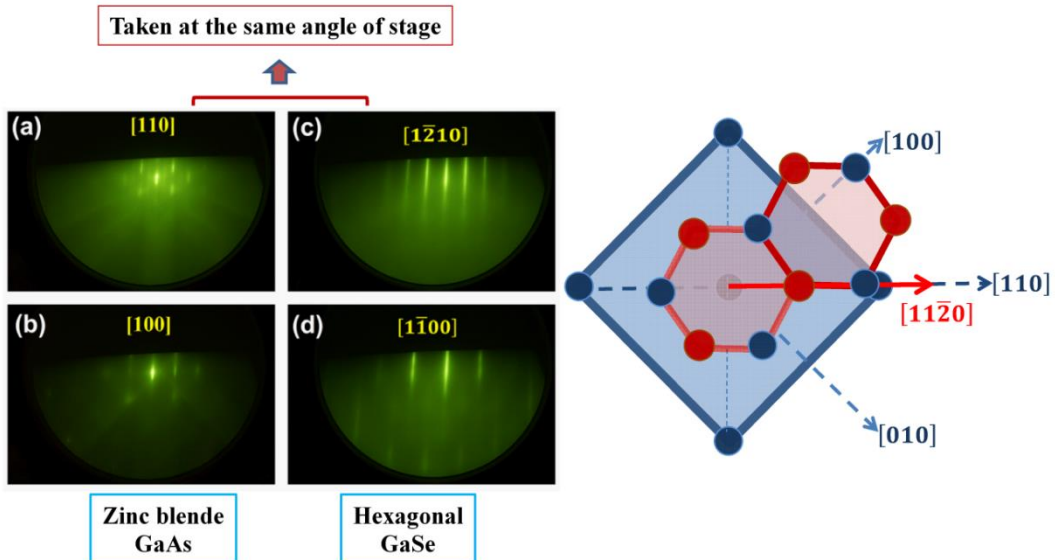

In comparison to the non Se-pretreated GaAs surface (Fig. S2a), the RHEED pattern of the Se-pretreated GaAs surface (Fig. S6a) shows extra lines in between spotty lines of GaAs. It is attributed to the presence of Se on GaAs surface.
